# Supplementary material for: Ecology and Caudal Skeletal Morphology in Birds: The Convergent Evolution of Pygostyle Shape in Underwater Foraging Taxa
Source: PLoS One. 2014 Feb 26;9(2):e89737. doi: 10.1371/journal.pone.0089737 (PMC3935938; doi:10.1371/journal.pone.0089737)
Supplement: Table S1 — Taxon list. Flight-style and foraging-style assignments, sample size, and specimen lists. Institutional Abbreviations– AMNH, American Museum of Natural History, New York, New York; CMNH, Carnegie Museum of Natural History, Pittsburgh, PA; FMNH, Field Museum of Natural History, Chicago, IL; NMNH, National Museum of Natural History, Washington, DC; OUVC, Ohio University Vertebrate Collection, Athens, OH. (XLSX) [file pone.0089737.s001.xlsx]

## Sheet: Sheet1
Taxon	Flight Style	Foraging Style	Number of Specimens	Specimen Mumbers
Anhinga anhinga	Static Soar	Foot-Propelled Pursuit Dive	5	AMNH 26731, AMNH 27180, AMNH 3823 FMNH 436398, FMNH 436399
Ardea herodias	Flap	Terrestrial	4	FMNH 330860, FMNH 342306, FMNH 430579 USNM 555715
Balaeniceps rex	Flap	Terrestrial	3	FMNH 104903, USNM 291364, USNM 345070
Cepphus columba	Flap	Wing-Propelled Pursuit Dive	3	CMNH 11609, CMNH 8253, USNM 612988
Ciconia abdimii	Static Soar	Terrestrial	3	FMNH 342352, FMNH 347518, USNM 430528
Ciconia ciconia	Static Soar	Terrestrial	3	FMNH 291513, USNM 605013, USNM 605021
Ciconia episcopus	Static Soar	Terrestrial	2	USNM 226001, USNM 430766
Cochlearius cochlearius	Flap	Terrestrial	3	AMNH 3561, AMNH 22680, AMNH 22681
Diomedea epomophora	Dynamic Soar	Aerial	1	USNM 561848
Diomedea exulans	Dynamic Soar	Aerial	3	USNM 321465, USNM 488376, USNM 559552
Eudocimus albus	Flap-Glide	Terrestrial	3	FMNH 375818, FMNH 375824, USNM 610612
Fratercula cirrhata	Flap	Wing-Propelled Pursuit Dive	3	CMNH 10808, CMNH 11726, USNM 558358
Fregata magnificens	Static Soar	Aerial	3	AMNH 2351, FMNH 375501, FMNH 375503
Fregata minor	Static Soar	Aerial	3	FMNH 313983, FMNH 339432, USNM 498442
Fulmarus glacialis	Flap-Glide	Aerial	4	AMNH 11386, AMNH 19556, AMNH 20664, AMNH 20697
Gavia immer	Flap	Foot-Propelled Pursuit Dive	5	CMNH s13107, CMNH s13111, CMNH s13117, FMNH 444970, FMNH 449129
Gavia stellata	Flap	Foot-Propelled Pursuit Dive	4	USNM 491297, USNM 556289, USNM 562802, USNM 491215
Ibidorhyncha struthersii	Flap	Terrestrial	2	USNM 292765, USNM 292766
Larus argentatus	Flap-Glide	Aerial	4	CMNH 7344, USNM 488781, USNM 502327, USNM 502393
Macronectes giganteus	Dynamic Soar	Aerial	3	USNM 346817, USNM 489529, USNM 559712
Morus bassanus	Static Soar	Plunge Dive	3	FMNH 364860, FMNH 375462, USNM 614826
Morus serrator	Static Soar	Plunge Dive	2	USNM 18770, USNM 612654
Mycteria americana	Static Soar	Terrestrial	4	FMNH 330007, FMNH 342350, USNM 622460, USNM 622462
Nesofregetta fuliginosa	Flap-Glide	Aerial	3	USNM 498015, USNM 613930, USNM 613931
Oceanites oceanicus	Flap-Glide	Aerial	4	AMNH 16599, AMNH 17331, AMNH 23546, AMNH 23548
Oceanodroma furcata	Flap-Glide	Aerial	3	USNM 556274, USNM 559560, USNM 620279
Pelecanoides urinatrix	Flap	Wing-Propelled Pursuit Dive	3	USNM 490900, USNM 55324, USNM 553243
Pelecanus erythrorhynchos	Static Soar	Aerial	3	FMNH 445082, FMNH 445083, USNM 535930
Pelecanus occidentalis	Static Soar	Plunge Dive	6	FMNH 342302, USNM 621485, OUVC 10221, OUVC 10433, OUVC 10478, OUVC 10484
Phaethon lepturus	Flap-Glide	Plunge Dive	2	USNM 489260, USNM 490770
Phaethon rubricauda	Flap-Glide	Plunge Dive	3	USNM 497917, FMNH 313967, FMNH 346039
Phalacrocorax africanus	Flap	Foot-Propelled Pursuit Dive	3	FMNH 368741, FMNH 368751, USNM 431691
Phalacrocorax auritus	Flap	Foot-Propelled Pursuit Dive	4	CMNH s10472, CMNH s13023, CMNH s16025, CMNH s7425
Phalacrocorax carbo	Flap	Foot-Propelled Pursuit Dive	3	USNM 553884, USNM 555669, USNM 558313
Phalacrocorax harrisi	Foot-Propelled Flightless	Foot-Propelled Pursuit Dive	3	FMNH 73862, USNM 19721, USNM 318779
Phalacrocorax melanoleucos	Flap	Foot-Propelled Pursuit Dive	3	USNM 561529, USNM 561533, USNM 561540
Phoebastria immutabilis	Dynamic Soar	Aerial	3	OUVC 10224, OUVC 10225, USNM 498138
Phoebastria nigripes	Dynamic Soar	Aerial	3	USNM 431382, USNM 488174, USNM 630954
Phoenicopterus chilensis	Flap	Terrestrial	3	USNM 321766, USNM 345025, USNM 614545,
Podiceps auritus	Flap	Foot-Propelled Pursuit Dive	3	USNM 501604, USNM 501606, USNM 501688
Puffinus gravis	Flap-Glide	Foot-Propelled Pursuit Dive	3	AMNH 11034, AMNH 16717, AMNH 28381
Pygoscelis adeliae	Wing-Propelled Flightless	Wing-Propelled Pursuit Dive	2	FMNH 96173, USNM 623439,
Pygoscelis papua	Wing-Propelled Flightless	Wing-Propelled Pursuit Dive	2	FMNH 330155, USNM 553258
Rollandia microptera	Foot-Propelled Flightless	Foot-Propelled Pursuit Dive	1	USNM 345660
Rollandia rolland	Flap	Foot-Propelled Pursuit Dive	3	USNM 614508, USNM 630998, USNM 630999
Scopus umbretta	Flap	Terrestrial	3	FMNH 313701, FMNH 320193, USNM 431669
Stercorarius parasiticus	Flap	Aerial	3	USNM 491646, USNM 502331, USNM 612274
Sula dactylatra	Flap-Glide	Plunge Dive	3	AMNH 5034, USNM 289144, USNM 498028
Sula sula	Flap-Glide	Plunge Dive	3	AMNH 1208, FMNH 375464, FMNH 454888
Threskiornis aethiopicus	Flap-Glide	Terrestrial	3	CMNH 9947, CMNH 11003, CMNH 11030
Uria aalge	Flap	Wing-Propelled Pursuit Dive	4	CMNH 8250, CMNH 11930, CMNH 14349, USNM 623293
