# Supplementary material for: Ecology and Caudal Skeletal Morphology in Birds: The Convergent Evolution of Pygostyle Shape in Underwater Foraging Taxa
Source: PLoS One. 2014 Feb 26;9(2):e89737. doi: 10.1371/journal.pone.0089737 (PMC3935938; doi:10.1371/journal.pone.0089737)
Supplement: Table S2 — Skeletal Data Table. Averaged by species. (XLSX) [file pone.0089737.s002.xlsx]

## Sheet: Sheet1
	First Post-Synsacral Vertebra								Mid-Caudal Vertebra											Propygostylar Vertebra											Body Size Proxy Metrics
Taxon	Centrum Length	Centrum Width	Centrum Height	Spinous Process Height	Spinous Process Length	Spinous Process Width	Transverse Process Length	Transverse Process Width	Centrum Length	Centrum Width	Centrum Height	Spinous Process Height	Spinous Process Length	Spinous Process Width	Transverse Process Length	Transverse Process Width	Ventral Process Height	Ventral Process Length	Ventral Process Width	Centrum Length	Centrum Width	Centrum Height	Spinous Process Height	Spinous Process Length	Spinous Process Width	Transverse Process Length	Transverse Process Width	Ventral Process Height	Ventral Process Length	Ventral Process Width	Left Femur Length	Synsacrum Length	Sternum Length	Sternum Width	Sternal Keel Height
Anhinga anhinga	5.51253	6.18113	3.14653	2.8696	3.79713	1.58833	3.89313	4.13153	5.0052	6.48223	3.24797	4.24673	2.6641	1.375	4.04767	5.06747	4.32987	2.94367	2.9443	5.76113	5.9078	3.64613	4.1804	1.60833	1.0414	2.989	1.41633	5.9966	4.8774	1.7916	55.432	75.616	58.696	47.266	22.958
Ardea herodias	4.2	4.0725	1.555	1.2275	2.5025	4.18425	2.78	6.3325	4.65125	3.855	2.2825	1.60625	2.1075	2.07	2.53125	5.165	0.83625	1.3525	1.1925	4.8625	4.185	2.4325	1.56	2.0225	0.5525	0.6975	0.47	3.33	3.9725	1.5525	100.583	84.9075	85.1425	50.615	36.615
Balaeniceps rex	7.96733	6.61633	3.87567	3.833	4.481	4.78033	4.29533	10.3627	7.60733	6.99933	3.93467	4.65867	3.96933	3.95467	5.06533	6.46433	1.21333	3.919	4.11133	7.295	6.86233	3.88367	3.626	3.29667	2.03	4.47067	2.962	4.20467	6.03333	3.721	127.257	119.64	109.487	76.45	51.68
Cepphus columba	3.37667	2.95667	1.12	0.65	2.34667	1.15333	2.28	3.32667	3.07667	1.87333	1.36667	1.26	0.81	0.926667	1.86	1.87333	0.336667	0.556667	0.28	2.84333	1.96333	1.48333	1.17333	0.51	0.113333	0.573333	1.13	0.123333	0.606667	0.03	39.0233	45.5567	90.7433	31.43	27.1067
Ciconia abdimii	4.48167	3.92	2.39333	2.19933	4.03567	2.62533	2.81733	5.65133	4.58333	3.954	2.32367	2.23933	2.83167	2.19133	2.687	3.283	0.503333	1.45733	2.344	4.40167	3.897	2.48867	2.882	1.975	1.15933	2.55633	1.687	2.58333	3.95633	1.95133	67.3267	80.2367	70.7267	50.7233	37.3767
Ciconia ciconia	5.37	4.48667	2.87333	3.30333	4.01667	2.79667	3.29333	8.31	4.99	4.57	2.91667	3.53	2.85667	2.24667	2.77	7.32333	0.443333	0.78	1.05	4.6	4.53333	3.12333	3.77	1.66	1.44667	2.98667	3.59333	3.15667	3.81333	2.55	92.8633	110.277	96.1067	67.9167	60.36
Ciconia episcopus	4.8075	3.3	2.3065	2.0695	3.5405	2.8235	2.7555	6.085	3.909	3.8755	2.197	2.3605	1.145	1.4675	1.925	5.0395	0.365	1.6475	4.6755	4.0385	3.14	1.315	2.851	1.26	1.4125	2.864	2.4795	2.795	3.142	2.348	72.215	88.06	73.12	49.55	40.71
Cochlearius cochlearius	3.03133	3.15533	1.46133	0.995667	2.60733	2.31667	1.79967	3.016	3.15383	2.655	1.8765	1.0585	1.931	1.603	2.178	2.85483	0.784667	1.02633	0.702667	2.50567	2.88867	1.59767	0.473333	1.30067	1.62167	1.606	0.959667	1.73233	2.23267	1.465	68.83	51.2	53.96	32.5367	25.2133
Diomedea epomophora	9.78	7.628	5.24	3.384	8.74	6.135	5.948	6.862	10.485	8.438	6.163	2.996	7.563	5.074	9.41	5.994	2.337	4.157	5.882	8.7	9.18	5.29	4.08	5.48	2.2	8.53	1.66	4.28	8.17	3.7	110.95	156.17	140.23	125.8	88.67
Diomedea exulans	9.59667	7.82333	4.61667	3.98667	5.95333	4.17	7.10333	6.87333	10.177	8.42333	6.07867	3.42767	5.02367	4.77567	6.65167	5.51	0.983333	1.75067	1.286	9.59833	7.34733	4.82	3.09	5.57	2.508	6.09	3.435	3.17333	8.38433	3.764	111.833	162.54	137.137	131.947	69.85
Eudocimus albus	3.66067	2.891	1.69733	1.87833	2.408	2.04133	2.67267	4.57333	3.393	2.6775	1.69333	2.05717	1.86633	1.55417	2.748	4.755	0.425	0.828333	1.1	3.43133	2.46467	1.73067	1.853	1.12733	0.424333	0.724333	0.385667	1.83333	2.32667	1.68367	64.5667	68.4233	75.4267	36.4667	40.43
Fratercula cirrhata	3.35333	4.11667	1.70333	0.77	2.49333	1.66667	2.30333	2.75	3.58	2.835	1.65667	1.85	0.921667	0.666667	1.85833	2.435	0.641667	0.791667	0.328333	3.23333	2.61333	1.72667	2.36667	0.786667	0.27	1.49667	2.08	1.04	2.10667	0.856667	45.3567	50.48	98.7967	39.4267	34.73
Fregata magnificens	4.947	5.168	3.52267	2.42533	3.16467	2.11667	3.174	7.75033	5.12017	5.307	3.9265	3.20767	2.72117	1.53833	3.89233	9.309	2.025	1.98333	1.97	5.19267	5.149	4.26833	3.10633	2.54333	1.42933	3.15533	5.36433	5.44667	3.49667	3.97667	53.83	65.8967	59.52	71.12	38.3833
Fregata minor	5.362	4.58733	3.13033	2.72167	3.66933	2.21433	3.01567	7.101	5.30417	5.7085	3.66983	3.05417	3.31533	1.97767	4.08017	9.12833	1.03933	1.385	2.09	5.53933	5.10833	3.30333	3.48133	2.47633	1.62867	4.28667	6.29767	5.55667	3.66	3.75	54.15	71.48	60.025	68.45	38.645
Fulmarus glacialis	3.81175	4.10775	1.23	1.80225	2.27775	1.2615	2.96675	3.8785	3.97063	3.84888	2.44612	2.24425	2.13713	1.14437	3.07213	5.25938	0.809	1.1535	1.7075	4.26275	3.68625	2.26825	1.23275	2.17525	0.697	2.4435	1.883	3.62775	2.5395	2.61025	44.26	54.34	53.7675	41.215	27.715
Gavia immer	6.4428	5.2958	3.856	4.125	5.637	2.5866	4.1376	2.7408	7.0081	6.0236	4.744	5.0469	4.8564	2.7486	4.3194	4.2506	2.1948	4.0489	3.1947	7.8546	5.5054	3.9612	4.04	5.3078	0.8072	4.1558	1.48	2.6774	5.9878	3.4088	53.4071	141.36	309.183	81.36	37.7243
Gavia stellata	5.1725	4.1725	3.1575	4.1325	1.8386	2.9475	3.3125	2.805	6.2225	3.8225	3.2375	4.8375	2.66	2.1275	3.4725	4.01	1.245	3.54	1.9475	6.2725	3.9675	2.995	3.65	2.6525	0.9275	2.7675	2.36	2.35	5.2175	2.3	38.8675	126.942	134.608	59.235	30.64
Ibidorhyncha struthersii	2.875	2.589	1.2835	1.237	1.1115	2.6325	2.054	3.0105	2.8265	2.257	1.448	1.9645	1.319	0.7225	2.088	2.122	0.32	0.813	0.7385	2.0935	2.675	1.2815	0.999	1.402	0.578	1.345	0.5255	1.375	1.7695	1.4145	41.455	36.01	56.96	25.065	25.245
Larus argentatus	4.365	3.875	1.6425	0.995	2.4775	1.68	2.1425	4.77	4.295	3.07	2.29375	2.44375	2.1425	0.66625	2.6375	5.32	0.2475	0.53125	0.6925	3.875	3.2	2.1875	1.6725	1.21	0.1975	0.965	1.0725	2.6275	2.33	1.26	60.095	62.36	72.41	46.5875	35.4725
Macronectes giganteus	6.99567	5.98667	3.01433	2.97267	3.11033	3.91533	3.74933	5.09633	6.937	5.68833	4.29967	3.655	3.50667	1.313	4.24033	7.303	1.45433	3.359	2.703	6.82333	5.45	4.24333	2.44	2.21	0.746667	2.25667	2.45333	3.02333	6.17333	4.05667	83.53	111.117	101.19	76.9367	54.68
Morus bassanus	7.04	6.96	4.60667	4.81	5.12333	2.18667	4.92667	3.60667	7.64667	7.885	5.315	4.27167	3.67333	2.3	4.88333	6.425	0	0	0	7.32333	7.76667	4.62	3.42	3.15	0.99	5.10667	9.15333	3.17	7.47333	2.64	73.4767	115.7	121.797	57.8	41.0957
Morus serrator	6.82	6.646	4.1385	4.4925	5.5745	3.2385	4.7175	3.8525	7.379	7.33875	4.573	3.7295	4.985	2.417	5.311	5.051	1.1535	3.5135	2.2635	7.082	6.127	3.532	2.747	3.2545	1.192	5.695	8.348	4.3385	6.83	2.5165	67.61	105.785	114.445	51.95	39.11
Mycteria americana	4.74725	3.52275	2.48225	1.9525	3.099	2.68175	3.0285	6.83625	4.02725	3.58688	2.58087	2.16613	2.40413	1.83625	3.03313	4.93788	0.11	0.1375	0.24	4.3975	3.77975	2.5525	1.7255	1.963	0.77975	2.72	1.24925	2.185	2.855	2.18325	96.4425	91.785	90.1175	51.23	43.985
Nesofregetta fuliginosa	1.64333	1.66	0.806667	0.64	0.896667	0.753333	0.853333	2.89	1.63333	1.49	0.646667	1.11667	0.686667	0.356667	1.05667	3	0.84	0.67	0.556667	1.64667	1.47333	1.17333	1.09	0.386667	0.306667	0.293333	0.263333	1.95667	0.956667	0.83	20.5533	20.3333	19.9233	19.75	11.7067
Oceanites oceanicus	1.256	1.61233	0.245667	0.344333	0.572	0.417333	1.093	1.74267	1.37333	1.1625	0.946167	0.648167	0.821833	0.384333	1.09417	2.07733	0.411667	0.111	0.715	1.49667	1.15067	0.831333	0.637333	0.833	0.3	0.551333	0.408333	1.542	0.964	1.09633	13.9525	16.32	20.1875	13.4575	10.325
Oceanodroma furcata	1.61533	2.12567	0.482	0.507	0.837667	0.409	0.969333	1.793	1.68283	1.17333	0.6405	0.768167	0.614833	0.237167	0.747167	2.82317	0.282833	0.6595	0.482833	1.463	0.929333	0.704333	0.882	0.464	0.13	0.873	0.987	1.644	1.11	0.926	18.21	18.78	24.5867	17.09	14.7167
Pelecanoides urinatrix	1.94233	2.33733	1.026	0.373667	1.75833	0.894333	0.987333	2.20567	2.279	1.65367	0.85	1.099	1.01567	0.54	1.27867	1.89333	0.172667	0.473	1.04233	2.23667	1.64	1.06667	1.38667	0.43	0.18	0.69	1.29667	0.486667	1.50667	0.92	24.0467	25.2	36.37	25.81	16.3333
Pelecanus erythrorhynchos	10.4367	7.04667	4.57667	3.27333	6.88667	4.38	5.49	8.49667	10.1667	7.00167	5.37833	3.79667	4.82333	3.75333	7.65	10.5917	0.483333	0.576667	0.715	10.1933	7.57667	4.99667	3.99667	3.97333	1.97	7.73	4.00667	3.87	7.92	4.44	105.56	229.827	124.015	107.95	51.0925
Pelecanus occidentalis	7.99333	5.45	3.29	2.50667	4.10333	3.88	5.17333	7.94333	8.09333	6.16333	4.31167	4.01667	3.75667	3.43	6.12833	8.385	0.765	1.47167	1.17	8.85667	6	3.57667	4.33667	2.76667	1.34	6.21333	3.18333	5.2	6.99667	1.65333	86.9033	180.633	108.677	82.2067	49.17
Phaethon lepturus	3.46	2.615	1.63	1.375	2.515	1.465	1.825	5.415	3.445	2.55	1.785	1.605	1.9	0.81	2.45	6.715	0.925	1.835	1.175	3.37	2.51	2.115	1.255	1.195	0.36	1.605	2.465	2.3	3.205	1.935	28.63	39.295	45.56	33.54	26.04
Phaethon rubricauda	4.21667	3.14667	2.6	2.18333	2.48667	1.33667	2.61667	4.88667	4.03	3.412	2.55133	1.631	2.58667	1.13167	2.91833	7.306	0.956667	2.17233	1.80267	3.63033	3.50733	1.99633	0.991	1.46767	0.625667	2.18667	3.02967	1.93	3.047	1.83367	36.33	47.6167	64.2567	46.56	30.2133
Phalacrocorax africanus	4.36433	4.37133	2.40933	2.69467	2.02133	1.55433	2.72433	3.091	4.33917	4.09267	2.78367	3.39083	1.733	1.24133	2.91083	4.5535	2.21017	3.81233	1.158	3.73	3.418	2.51933	2.91367	1.07733	0.168667	1.91833	1.27967	4.62067	2.886	1.77633	37.6133	73.46	45.2633	36.1933	20.1267
Phalacrocorax auritus	7.29	6.90175	3.494	4.049	4.5625	2.454	5.81075	3.33025	6.86188	6.7055	3.76125	4.485	4.31613	2.13025	4.80675	5.31675	3.666	4.00338	2.18913	6.23475	5.7175	4.00875	3.86775	3.622	1.145	4.668	3.81325	5.553	5.575	2.9795	59.466	114.53	83.596	60.648	36.402
Phalacrocorax carbo	8.67667	7.51667	3.06	5.49	3.76333	2.32	5.95	3.24667	7.20333	7.41667	4.365	6.855	3.60333	1.78	5.09833	7.47667	2.76667	5.24667	3.155	7.08	6.04	4.17667	5.35	3.92333	0.823333	3.90667	3.84333	5.72	5.37667	3.14333	62.0433	136.483	87.9367	65.16	37.24
Phalacrocorax harrisi	8.58667	8	4.62	5.34667	4.07667	4.19667	4.17333	3.76	7.655	9.56833	6.13	5.51	3.54333	2.94333	4.41333	7.01167	3.245	4.22167	3.74333	6.53333	7.66	4.71333	6.08333	3.06667	1.07667	3.81	4.36	6.39333	4.85333	3.47	64.5167	143.653	80.7567	77.0933	10.38
Phalacrocorax melanoleucos	4.57333	3.91333	2.35	2.28333	2.8	1.05667	1.71	2.53333	3.99167	3.96167	3.10833	4.01	1.83167	0.981667	2.28333	2.71333	1.66333	2.305	1.17667	4.56333	3.59	2.29333	4.07667	2.35	1.91667	1.59667	1.80333	3.83333	2.81667	1.77667	43.2667	76.37	47.9667	38.7267	20.0067
Phoebastria immutabilis	6.954	5.545	4.635	2.0955	4.6725	2.409	4.0395	4.583	7.194	5.788	4.047	2.4355	4.841	2.434	5.466	3.76	2.364	2.467	2.7625	6.1815	5.8225	3.3545	1.3855	5.019	1.3255	5.046	3.2695	2.469	3.7885	2.29	73.835	113.69	88.35	79.4	47.285
Phoebastria nigripes	6.71	4.69667	3.31333	1.75333	4.02667	3.14667	3.65	5.09	6.39733	4.75233	3.279	2.163	3.66267	2.24967	5.174	4.693	0.953333	2.003	1.77433	6.45867	4.96633	3.03867	1.058	4.03867	1.60967	3.95167	2.813	3.61067	4.543	2.28567	76.53	100.757	87.9667	82.85	46.7033
Phoenicopterus chilensis	6.94967	4.60467	2.16367	1.67467	5.162	3.233	4.45667	7.54133	6.071	4.19967	2.45733	1.45233	3.89783	3.21617	3.98783	5.21733	0.871333	1.436	1.53633	5.14067	4.25233	2.29567	2.68833	2.04333	0.705333	2.228	1.36667	3.11	2.33233	2.51533	88.73	91.62	108.077	59.88	43.5633
Podiceps auritus	3.42	2.086	1.309	1.227	2.238	0.882	1.835	0.574	3.2375	2.4315	1.352	0.9815	1.785	1.4015	2.965	0.9545	0.2165	1.665	1.9455	3.357	2.255	1.222	0.924	1.541	0.616	1.828	0.178	0.709	2.573	0.776	32.38	49.8633	44.92	33.87	17.9667
Puffinus gravis	4.4245	3.3255	2.3475	1.38	3.117	0.9565	3.2545	3.8285	3.93	3.27	2.90575	2.1265	2.55325	0.82475	2.95425	5.13175	1.389	2.466	1.452	3.875	3.486	2.2015	1.3085	2.4845	0.6335	2.417	1.1345	2.9695	3.1095	2.0365	40	69.3867	56.6767	42.2133	29.0333
Pygoscelis adeliae	5.89	6.805	4.63	4.39	4.195	5.9155	4.97	4.935	7.81225	7.20725	4.778	3.3405	2.678	5.4475	5.57225	4.21	2.62075	4.22825	3.953	8.2375	7.811	5.169	2.174	1.635	1.657	5.2735	2.132	3.126	6.0655	5.8125	79.03	117.8	126.08	64.77	38.11
Pygoscelis papua	6.43	8.38	5.225	4.38	3.825	7.085	6.615	4.64	7.4	7	5.61	4.55	2.725	6.425	5.575	5.82	0.84	1.145	2.33	8.325	6.935	4.41	3.255	1.5	1.46	3.85	3.31	2.655	6.135	6.17	88.155	107.985	151.285	74.26	43.335
Rollandia microptera	3.425	2.699	1.39	1.579	2.418	2.128	1.83	0.177	3.204	2.562	1.56	1.482	1.927	0.905	2.142	0.573	0	0	0	2.796	2.213	1.452	0.777	1.415	0.46	0.917	0.117	0.757	1.522	0.656	41.56	65.17	42.1	36.63	5.57
Rollandia rolland	2.25667	2.06333	1.26667	1.47333	1.03	0.753333	0.613333	0.283333	2.46	1.52167	1.00167	1.15833	0.69	1.09	1.275	0.636667	0	0	0	2.30333	1.27667	0.733333	0.676667	0.64	0.28	0.68	0.316667	0.353333	1.66667	0.5	31.1067	42.8867	33.7633	24.2733	10.5667
Scopus umbretta	3.30333	3.17667	1.54	2.27667	1.73667	1.01667	2.58	5.90667	3.38667	2.535	1.77833	2.60833	1.345	0.721667	2.1	6.16667	0.726667	1.13833	0.891667	3.52667	3.53667	1.45667	1.43667	1.33333	0.37	1.36667	1.17667	2.74667	2.19	1.68667	49.2867	47.9133	49.62	31.3233	24.5533
Stercorarius parasiticus	3.52667	2.67667	1.67	1.36333	2.38	1.28	2.10333	4.05	3.434	3.206	1.88133	1.857	1.784	0.882667	1.92233	4.8905	0.255	0.665	0.813333	3.39133	2.94767	1.74967	1.595	1.573	0.826667	0	0	3.02667	2.38	1.78	39.1267	46.8033	66.4833	34.34	31.55
Sula dactylatra	6.81433	5.66967	2.906	2.93833	4.506	3.358	4.87	4.95433	7.06233	6.27567	4.219	3.17767	4.15867	2.38233	5.518	7.414	0.37	1.64333	2.08633	6.546	5.23433	3.604	2.78467	3.538	1.14133	6.10133	10.086	3	5.385	2.97167	60.5633	105.88	98.24	50.7933	33.3933
Sula sula	5.48533	4.284	3.12867	2.46867	3.412	2.09233	3.838	6.35767	5.3405	4.154	3.24917	2.43767	3.11967	1.892	4.14417	7.24783	1.42817	2.47167	1.678	5.206	3.649	2.97167	1.809	2.23933	0.468667	4.66067	8.49767	3.789	4.465	1.942	48.4533	79.0567	72.7433	41.17	29.8433
Threskiornis aethiopicus	4.66333	3.47	1.63	1.95333	2.39667	1.29	3.04667	4.93	4.03	3.425	2.205	2.665	1.64333	1.52833	2.22333	4.14667	0.346667	0.51	0.98	4.02333	2.77	1.88333	1.59667	1.27333	0.236667	0.326667	0.23	2.36	3.06667	1	71.5533	74.7267	81.1733	45.0333	38.4167
Uria aalge	3.94	3.955	1.91	1.2975	2.255	1.56	1.995	3.595	3.81288	3.22162	2.2095	1.84137	1.87125	0.985	2.76613	3.00637	0.888	1.61163	1.14888	3.7935	2.78375	2.0935	1.7445	1.582	0.23475	0.4395	0.101	0.76525	2.294	0.94075	47.3733	58.1167	105.833	38.1467	34.1033
